# Supplementary material for: Prognostic and Immunological Role of mRNA ac4C Regulator NAT10 in Pan-Cancer: New Territory for Cancer Research?
Source: PubMed Central journal article supplement (PMC8170476; doi:10.3389/fonc.2021.630417), 2021-05-19

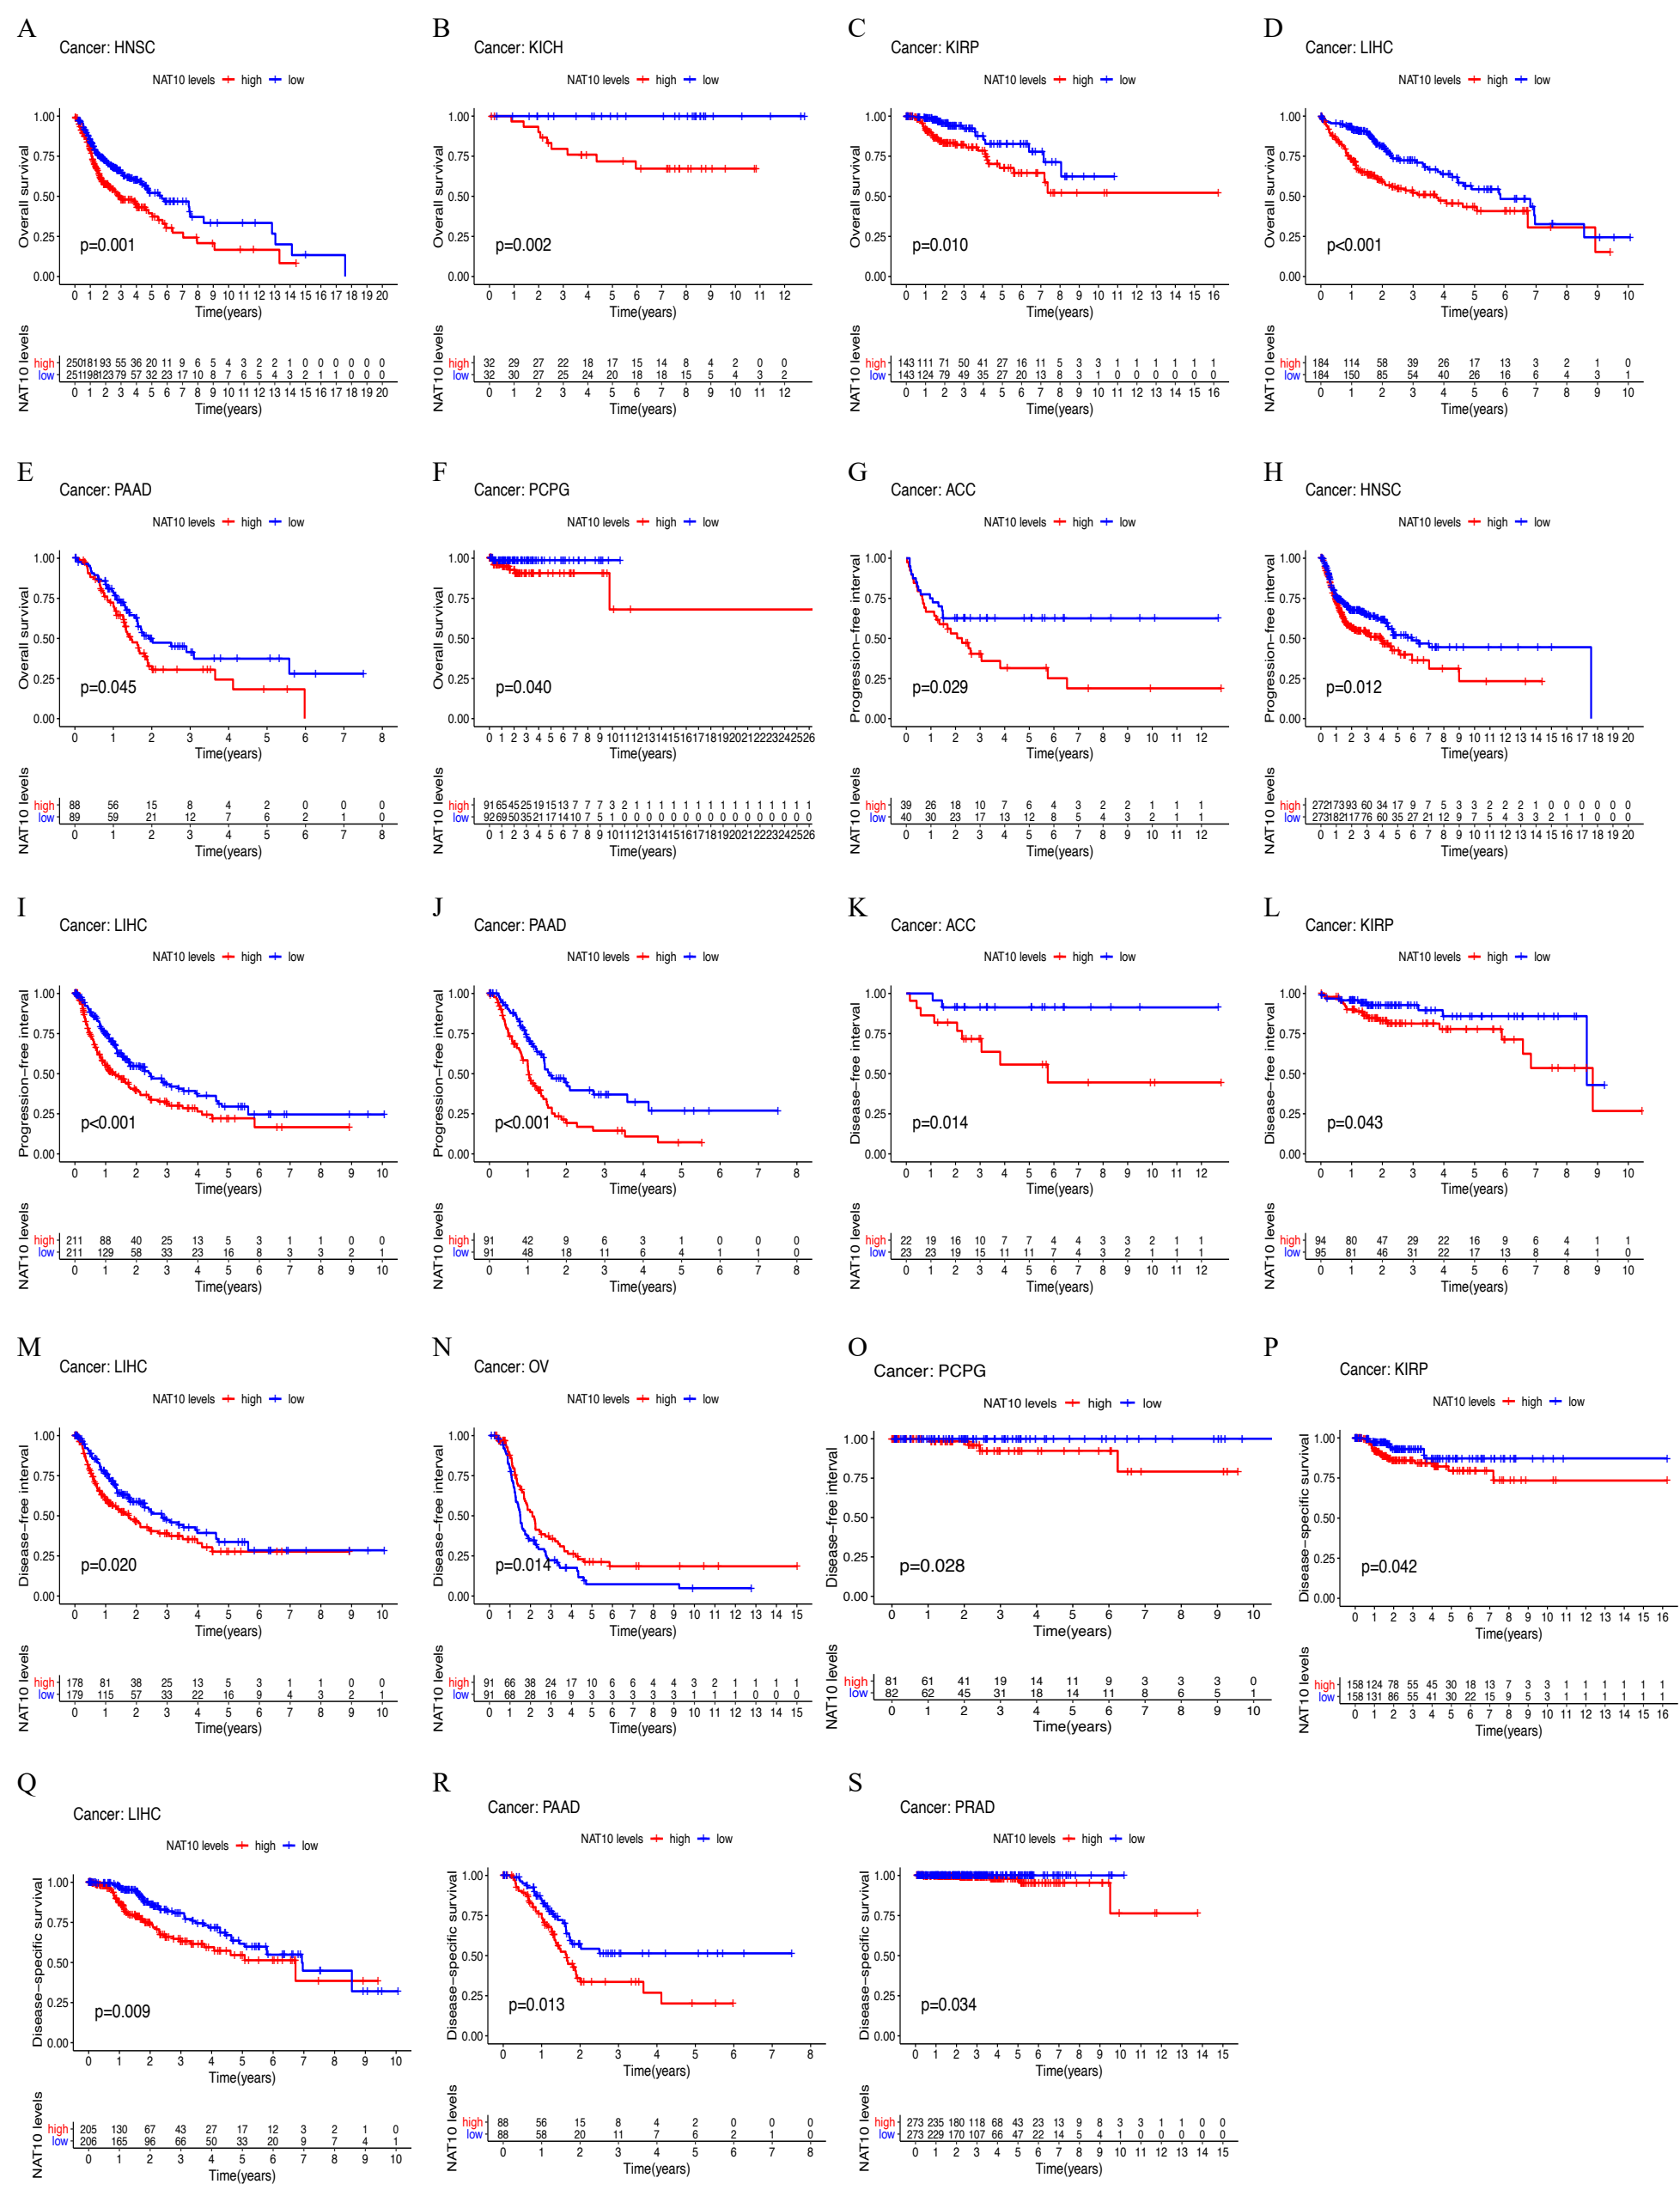

Supplement: Image_4.pdf [file Image_4.pdf]
