# Supplementary material for: Prognostic and Immunological Role of mRNA ac4C Regulator NAT10 in Pan-Cancer: New Territory for Cancer Research?
Source: PubMed Central journal article supplement (PMC8170476; doi:10.3389/fonc.2021.630417), 2021-05-19
Supplement: Image_5.pdf [file Image_5.pdf]

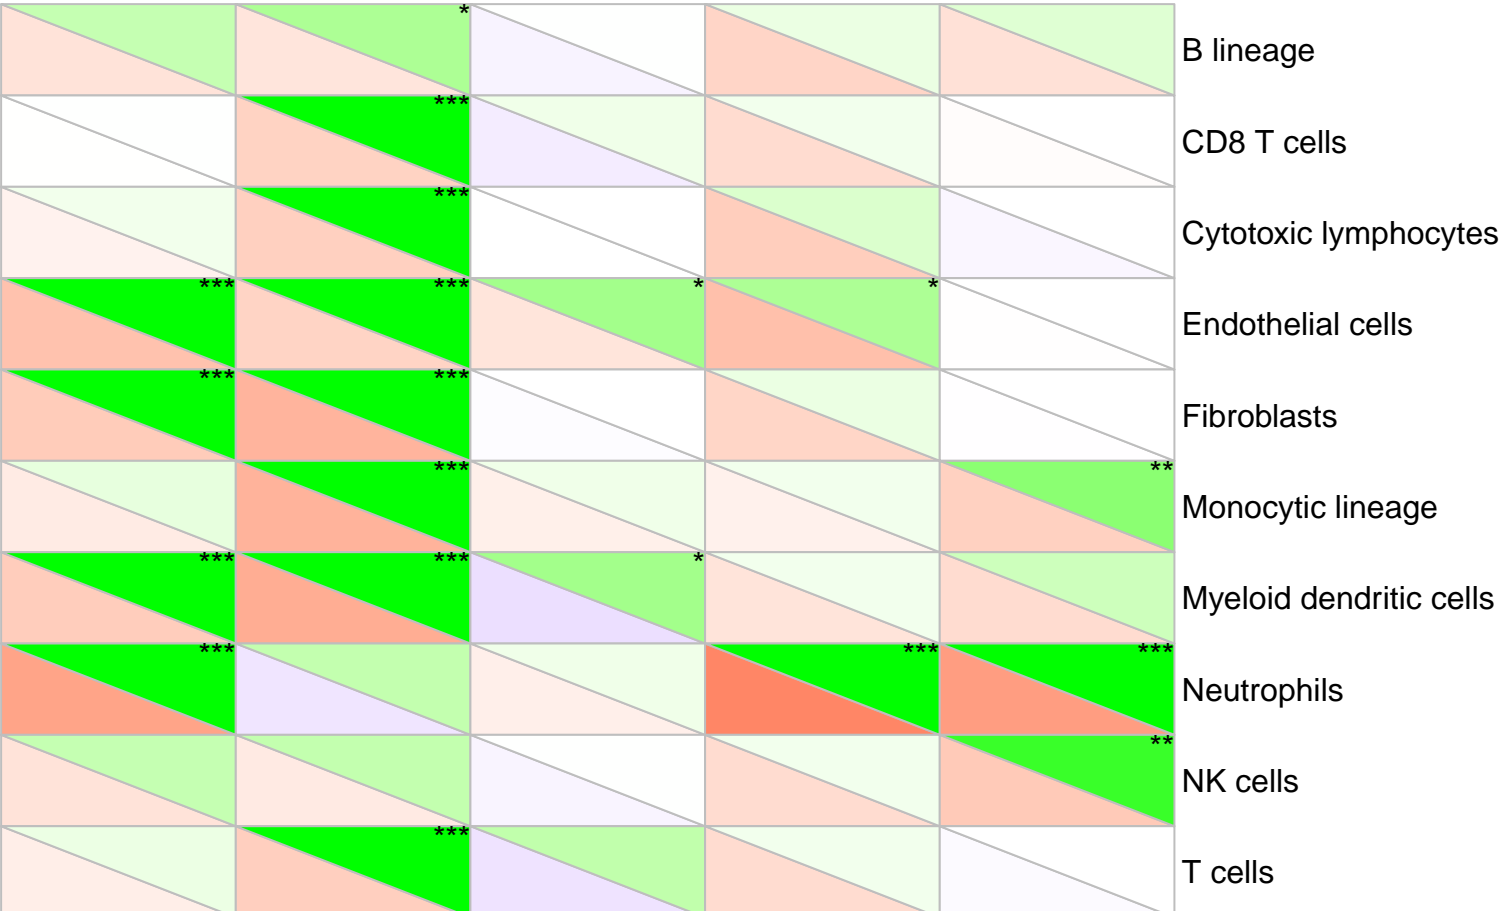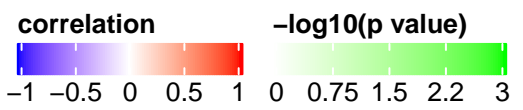

KIRP

LIHC

HNSC

ACC

PCPG

B lineage

CD8 T cells

Cytotoxic lymphocytes

Endothelial cells

Fibroblasts

Monocytic lineage

Myeloid dendritic cells

Neutrophils

NK cells

T cells
